# Supplementary material for: Synergistic Engineering of Nanoporous Structure and Surface Chemistry via Ultrasound-Assisted Oxidative Reactivation for Enhanced NO Adsorption
Source: Research Square preprint supplement (doi:10.21203/rs.3.rs-7940238/v1), 2025-11-28
Supplement: Supplementary file 1 [file c4316eee940b63f7e1298b51.docx]

**Highlights**

- **Ultrasound oxidation synergistically tunes pores and chemistry.**
- **Micropore size precisely matches NO molecular diameter.**
- **Optimized surface groups enhance NO adsorption and catalysis.**
